# Supplementary material for: A rodent model of rapid-onset diabetes induced by glucocorticoids and high-fat feeding
Source: PubMed Central journal article supplement — Dis Model Mech. 2011 Dec 19;5(5):671–80. doi: 10.1242/dmm.008912 (PMC3424464; doi:10.1242/dmm.008912), 2011-12-19

**Supplemental figure 1. Diurnal corticosterone levels in rats treated with wax or corticosterone pellet implants for a 14 day period (pilot data).** Plasma corticosterone concentrations were measured at peak (8 PM) and trough (8 AM) in placebo-treated (wax), 200 mg corticosterone-treated or 400 mg corticosterone- treated rats. N=3 for each group. Values are  $\pm$  SEM.

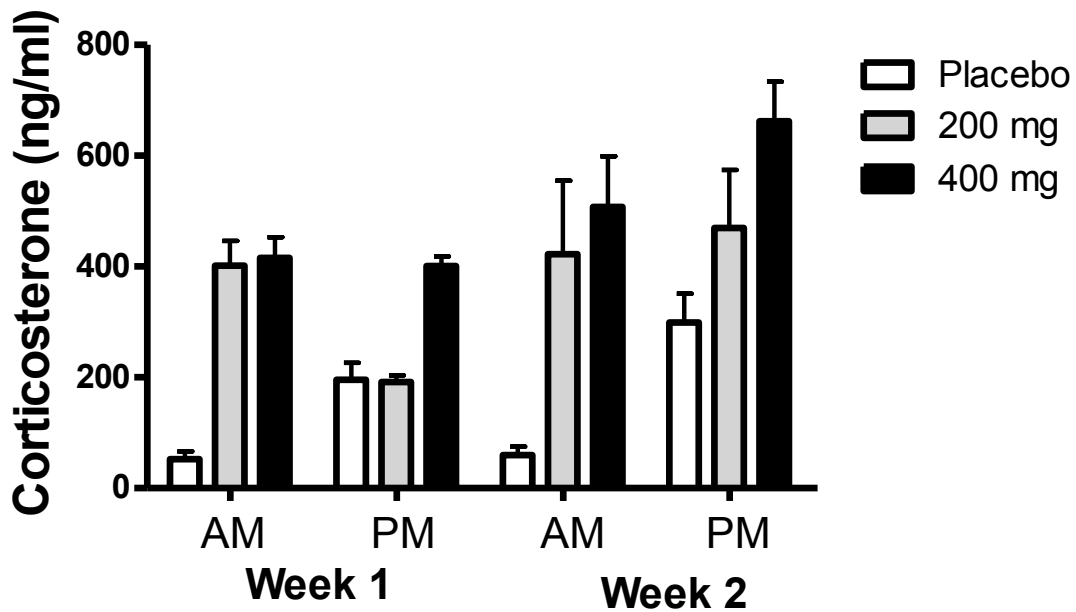

Supplement: supp_008912_DMM008912FigS1.pdf [file supp_008912_DMM008912FigS1.pdf]
